# Supplementary material
Source: PubMed Central journal article supplement (PMC6444913)
Supplement: Supp_Fig1.pdf [file Supp_Fig1.pdf]

## Supplementary Data

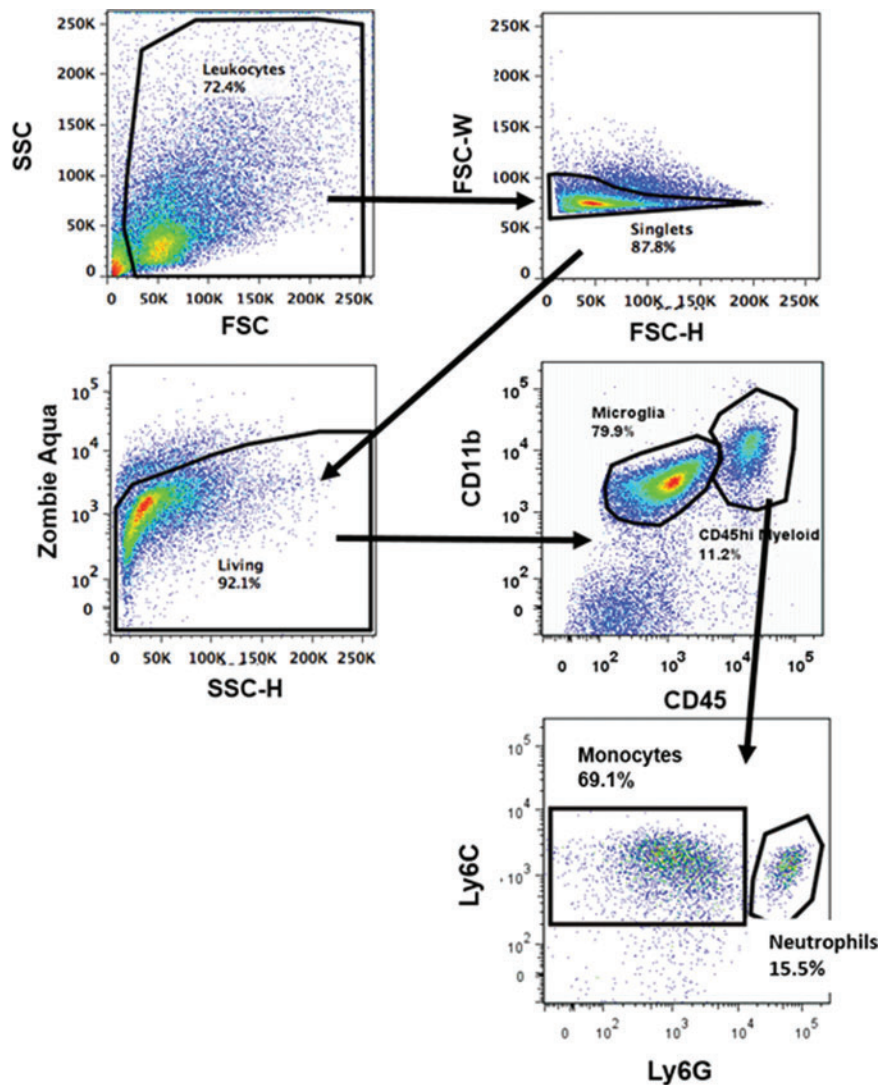

**SUPPLEMENTARY FIG. S1.** Flow cytometry gating strategy for peripherally derived infiltrating myeloid cells and resident microglia following traumatic brain injury. Mononuclear cells from brain were stained with ZombieAqua Live-Dead stain, CD45-eF450, and CD11b APC-eF780. Leukocytes were identified based on side scatter (SSC) and forward scatter (FSC), and then gated on a FSC-width (FSC-W) and FSC-height (FSC-H) for single cells. Dead cells were identified by gating on the FSC-H and ZombieAqua negative gate, and cells that did not retain the ZombieAqua dye were viable. Living singlet leukocytes were identified as resident microglia (CD11b+CD45<sup>int</sup>) or infiltrating myeloid cells (CD11b+CD45<sup>hi</sup>) based on CD45 gating, and then further analyzed using phenotypic and functional markers. Infiltrating myeloid cells can be further subdivided into neutrophils (Ly6G+Ly6C+) and monocytes (Ly6G-Ly6C+). Less than ~20% of total infiltrating myeloid cells are neutrophils in the brain at 1 day post-injury which is reduced to ~5% neutrophils in the brain at 3 days post-injury, with no sex difference in monocyte and neutrophil frequencies.
